# Supplementary material for: Fresh Phyllanthus emblica (Amla) Fruit Supplementation Enhances Milk Fatty Acid Profiles and the Antioxidant Capacities of Milk and Blood in Dairy Cows
Source: MDPI journal article supplement (doi:10.3390/antiox11030485), 2022-02-28
Supplement: s1 [file s1]

Table S1 Classification of the 514 detected metabolites in fresh amla fruit

| Primary classification      | Secondary classification     | Number of metabolites |
|-----------------------------|------------------------------|-----------------------|
| Phenolic acids              | Phenolic acids               | 113                   |
| Lipids                      | Free fatty acids             | 49                    |
|                             | Glycerol ester               | 12                    |
|                             | Lysophosphatidylcholine      | 22                    |
|                             | Lysophosphatidylethanolamine | 17                    |
|                             | Phosphatidylcholines         | 1                     |
|                             | Sphingolipids                | 1                     |
| Flavonoids                  | Anthocyanidins               | 1                     |
|                             | Chalcones                    | 4                     |
|                             | Flavanols                    | 11                    |
|                             | Flavanones                   | 15                    |
|                             | Flavanonols                  | 6                     |
|                             | Flavones                     | 21                    |
|                             | Flavonoid carbonoside        | 2                     |
|                             | Flavonols                    | 38                    |
|                             | Isoflavones                  | 3                     |
| Amino acids and derivatives | Amino acids and derivatives  | 46                    |
| Tannins                     | Tannin                       | 34                    |
|                             | Proanthocyanidins            | 4                     |
| Alkaloids                   | Alkaloids                    | 10                    |
|                             | Phenolamine                  | 1                     |
|                             | Plumerane                    | 4                     |
|                             | Pyridine alkaloids           | 1                     |
|                             | Pyrrole alkaloids            | 2                     |
|                             | Piperidine alkaloids         | 1                     |
| Organic acids               | Organic acids                | 16                    |
| Terpenoids                  | Diterpenoids                 | 1                     |
|                             | Monoterpenoids               | 4                     |
|                             | Sesquiterpenoids             | 2                     |
|                             | Triterpene                   | 9                     |
| Lignans and Coumarins       | Coumarins                    | 2                     |
|                             | Lignans                      | 10                    |
| Nucleotides and derivatives | Nucleotides and derivatives  | 10                    |
| Others                      | Saccharides and Alcohols     | 24                    |
|                             | Stilbene                     | 1                     |
|                             | Vitamin                      | 8                     |
|                             | Others                       | 8                     |
