# Supplementary material for: Fresh Phyllanthus emblica (Amla) Fruit Supplementation Enhances Milk Fatty Acid Profiles and the Antioxidant Capacities of Milk and Blood in Dairy Cows
Source: MDPI journal article supplement (doi:10.3390/antiox11030485), 2022-02-28
Supplement: s1 [file s1]

Table S4: Pairwise correlation coefficients between individual FA<sup>1</sup> profiles (g/100 g of total fatty acids) or groupings of fatty acids

| Variable          | by Variable  | Correlation | Lower 95% | Upper 95% | Signif Prob |  |
|-------------------|--------------|-------------|-----------|-----------|-------------|--|
| C14:0             | C12:0        | 0.8297      | 0.7070    | 0.9039    | <.0001*     |  |
| C16:0             | C12:0        | 0.4767      | 0.2094    | 0.6777    | 0.0011*     |  |
| C16:0             | C14:0        | 0.6570      | 0.4474    | 0.7982    | <.0001*     |  |
| C18:0             | C12:0        | -0.5601     | -0.7348   | -0.3157   | <.0001*     |  |
| C18:0             | C14:0        | -0.6058     | -0.7651   | -0.3767   | <.0001*     |  |
| C18:0             | C16:0        | -0.7107     | -0.8320   | -0.5245   | <.0001*     |  |
| C20:5             | C12:0        | -0.3179     | -0.5618   | -0.0232   | 0.0355*     |  |
| C20:5             | C14:0        | -0.4283     | -0.6434   | -0.1506   | 0.0037*     |  |
| C20:5             | C16:0        | -0.5351     | -0.7180   | -0.2833   | 0.0002*     |  |
| C20:5             | C18:0        | 0.1519      | -0.1518   | 0.4294    | 0.3249      |  |
| C22:6             | C12:0        | -0.3745     | -0.6042   | -0.0873   | 0.0123*     |  |
| C22:6             | C14:0        | -0.5017     | -0.6950   | -0.2406   | 0.0005*     |  |
| C22:6             | C16:0        | -0.6034     | -0.7635   | -0.3734   | <.0001*     |  |
| C22:6             | C18:0        | 0.1766      | -0.1269   | 0.4499    | 0.2514      |  |
| C22:6             | C20:5        | 0.8076      | 0.6718    | 0.8909    | <.0001*     |  |
| Denovo FA         | C12:0        | 0.9394      | 0.8911    | 0.9667    | <.0001*     |  |
| Denovo FA         | C14:0        | 0.9480      | 0.9062    | 0.9715    | <.0001*     |  |
| Denovo FA         | C16:0        | 0.6222      | 0.3990    | 0.7758    | <.0001*     |  |
| Denovo FA         | C18:0        | -0.6613     | -0.8009   | -0.4534   | <.0001*     |  |
| Denovo FA         | C20:5        | -0.3829     | -0.6104   | -0.0970   | 0.0103*     |  |
| Denovo FA         | C22:6        | -0.4419     | -0.6531   | -0.1669   | 0.0027*     |  |
| Preformed FA      | C12:0        | -0.6589     | -0.7994   | -0.4500   | <.0001*     |  |
| Preformed FA      | C14:0        | -0.7646     | -0.8651   | -0.6051   | <.0001*     |  |
| Preformed FA      | C16:0        | -0.9060     | -0.9479   | -0.8333   | <.0001*     |  |
| Preformed FA      | C18:0        | 0.8943      | 0.8133    | 0.9413    | <.0001*     |  |
| Preformed FA      | C20:5        | 0.4356      | 0.1593    | 0.6486    | 0.0031*     |  |
| Preformed FA      | C22:6        | 0.4473      | 0.1735    | 0.6570    | 0.0023*     |  |
| Preformed FA      | Denovo FA    | -0.7794     | -0.8741   | -0.6278   | <.0001*     |  |
| Mixed FA          | C12:0        | 0.4619      | 0.1912    | 0.6673    | 0.0016*     |  |
| Mixed FA          | C14:0        | 0.6442      | 0.4295    | 0.7900    | <.0001*     |  |
| Mixed FA          | C16:0        | 0.9969      | 0.9942    | 0.9983    | <.0001*     |  |
| Mixed FA          | C18:0        | -0.7113     | -0.8324   | -0.5253   | <.0001*     |  |
| Mixed FA          | C20:5        | -0.5316     | -0.7156   | -0.2788   | 0.0002*     |  |
| Mixed FA          | C22:6        | -0.6080     | -0.7665   | -0.3797   | <.0001*     |  |
| Mixed FA          | Denovo FA    | 0.6105      | 0.3831    | 0.7682    | <.0001*     |  |
| Mixed FA          | Preformed FA | -0.9020     | -0.9457   | -0.8264   | <.0001*     |  |
| OCFA <sup>2</sup> | C12:0        | 0.3430      | 0.0513    | 0.5807    | 0.0227*     |  |
| OCFA              | C14:0        | 0.5451      | 0.2962    | 0.7247    | 0.0001*     |  |
| OCFA              | C16:0        | 0.5121      | 0.2538    | 0.7022    | 0.0004*     |  |
| OCFA              | C18:0        | -0.3983     | -0.6216   | -0.1150   | 0.0074*     |  |
| OCFA              | C20:5        | -0.1582     | -0.4346   | 0.1455    | 0.3052      |  |
| OCFA              | C22:6        | -0.1674     | -0.4423   | 0.1363    | 0.2775      |  |
| OCFA              | Denovo FA    | 0.4881      | 0.2236    | 0.6856    | 0.0008*     |  |
| OCFA              | Preformed FA | -0.4695     | -0.6726   | -0.2005   | 0.0013*     |  |
| OCFA              | Mixed FA     | 0.4928      | 0.2295    | 0.6889    | 0.0007*     |  |
| BCFA <sup>3</sup> | C12:0        | -0.1026     | -0.3877   | 0.2004    | 0.5076      |  |
| BCFA              | C14:0        | -0.2498     | -0.5089   | 0.0509    | 0.1020      |  |
| BCFA              | C16:0        | -0.4707     | -0.6735   | -0.2021   | 0.0013*     |  |
| BCFA              | C18:0        | 0.0362      | -0.2635   | 0.3295    | 0.8156      |  |

| Variable           | by Variable  | Correlation | Lower 95% | Upper 95% | Signif Prob |        |        |        |
|--------------------|--------------|-------------|-----------|-----------|-------------|--------|--------|--------|
| BCFA               | C20:5        | 0.5991      | 0.3676    | 0.7607    | <.0001*     |        |        | ██████ |
| BCFA               | C22:6        | 0.7379      | 0.5647    | 0.8488    | <.0001*     |        |        | ██████ |
| BCFA               | Denovo FA    | -0.1590     | -0.4354   | 0.1447    | 0.3025      |        |        | █      |
| BCFA               | Preformed FA | 0.2760      | -0.0227   | 0.5295    | 0.0697      |        |        | ██     |
| BCFA               | Mixed FA     | -0.4736     | -0.6755   | -0.2056   | 0.0012*     |        | ██████ |        |
| BCFA               | OCFA         | 0.0513      | -0.2493   | 0.3430    | 0.7407      |        |        | █      |
| OBCFA <sup>4</sup> | C12:0        | 0.1421      | -0.1616   | 0.4212    | 0.3577      |        |        | █      |
| OBCFA              | C14:0        | 0.1616      | -0.1421   | 0.4375    | 0.2947      |        |        | █      |
| OBCFA              | C16:0        | -0.0230     | -0.3177   | 0.2758    | 0.8824      |        |        | █      |
| OBCFA              | C18:0        | -0.2263     | -0.4903   | 0.0756    | 0.1396      |        | ██████ |        |
| OBCFA              | C20:5        | 0.3429      | 0.0512    | 0.5807    | 0.0227*     |        |        | ██████ |
| OBCFA              | C22:6        | 0.4398      | 0.1644    | 0.6516    | 0.0028*     |        |        | ██████ |
| OBCFA              | Denovo FA    | 0.1925      | -0.1107   | 0.4629    | 0.2107      |        |        | ██     |
| OBCFA              | Preformed FA | -0.0941     | -0.3803   | 0.2086    | 0.5436      |        |        | █      |
| OBCFA              | Mixed FA     | -0.0373     | -0.3305   | 0.2625    | 0.8101      |        |        | █      |
| OBCFA              | OCFA         | 0.6735      | 0.4708    | 0.8087    | <.0001*     |        |        | ██████ |
| OBCFA              | BCFA         | 0.7728      | 0.6176    | 0.8700    | <.0001*     |        |        | ██████ |
| SFA <sup>5</sup>   | C12:0        | 0.6289      | 0.4083    | 0.7801    | <.0001*     |        |        | ██████ |
| SFA                | C14:0        | 0.8158      | 0.6848    | 0.8958    | <.0001*     |        |        | ██████ |
| SFA                | C16:0        | 0.8616      | 0.7589    | 0.9225    | <.0001*     |        |        | ██████ |
| SFA                | C18:0        | -0.5443     | -0.7242   | -0.2951   | 0.0001*     |        | ██████ |        |
| SFA                | C20:5        | -0.4748     | -0.6764   | -0.2072   | 0.0011*     |        | ██████ |        |
| SFA                | C22:6        | -0.5750     | -0.7448   | -0.3354   | <.0001*     |        | ██████ |        |
| SFA                | Denovo FA    | 0.7659      | 0.6071    | 0.8659    | <.0001*     |        |        | ██████ |
| SFA                | Preformed FA | -0.7997     | -0.8862   | -0.6593   | <.0001*     | ██████ |        |        |
| SFA                | Mixed FA     | 0.8482      | 0.7369    | 0.9148    | <.0001*     |        |        | ██████ |
| SFA                | OCFA         | 0.6465      | 0.4327    | 0.7915    | <.0001*     |        |        | ██████ |
| SFA                | BCFA         | -0.4051     | -0.6266   | -0.1230   | 0.0064*     |        | ██████ |        |
| SFA                | OBCFA        | 0.1111      | -0.1921   | 0.3949    | 0.4729      |        |        | █      |
| MUFA <sup>6</sup>  | C12:0        | -0.6299     | -0.7808   | -0.4096   | <.0001*     |        | ██████ |        |
| MUFA               | C14:0        | -0.7132     | -0.8336   | -0.5281   | <.0001*     |        | ██████ |        |
| MUFA               | C16:0        | -0.7380     | -0.8489   | -0.5649   | <.0001*     |        | ██████ |        |
| MUFA               | C18:0        | 0.8253      | 0.6999    | 0.9013    | <.0001*     |        |        | ██████ |
| MUFA               | C20:5        | 0.2201      | -0.0822   | 0.4853    | 0.1511      |        |        | ██     |
| MUFA               | C22:6        | 0.2062      | -0.0966   | 0.4741    | 0.1792      |        |        | ██     |
| MUFA               | Denovo FA    | -0.7334     | -0.8460   | -0.5580   | <.0001*     |        | ██████ |        |
| MUFA               | Preformed FA | 0.8976      | 0.8190    | 0.9432    | <.0001*     |        |        | ██████ |
| MUFA               | Mixed FA     | -0.7229     | -0.8396   | -0.5425   | <.0001*     | ██████ |        |        |
| MUFA               | OCFA         | -0.4997     | -0.6937   | -0.2381   | 0.0006*     |        | ██████ |        |
| MUFA               | BCFA         | 0.0937      | -0.2090   | 0.3800    | 0.5452      |        |        | █      |
| MUFA               | OBCFA        | -0.2482     | -0.5077   | 0.0525    | 0.1042      |        | ██████ |        |
| MUFA               | SFA          | -0.7880     | -0.8792   | -0.6410   | <.0001*     | ██████ |        |        |
| PUFA <sup>7</sup>  | C12:0        | -0.1290     | -0.4102   | 0.1745    | 0.4039      |        |        | █      |
| PUFA               | C14:0        | -0.3165     | -0.5607   | -0.0216   | 0.0363*     |        | ██████ |        |
| PUFA               | C16:0        | -0.6240     | -0.7769   | -0.4015   | <.0001*     |        | ██████ |        |
| PUFA               | C18:0        | 0.1125      | -0.1907   | 0.3962    | 0.4672      |        |        | █      |
| PUFA               | C20:5        | 0.7217      | 0.5406    | 0.8388    | <.0001*     |        |        | ██████ |
| PUFA               | C22:6        | 0.7980      | 0.6567    | 0.8852    | <.0001*     |        |        | ██████ |
| PUFA               | Denovo FA    | -0.2323     | -0.4950   | 0.0694    | 0.1292      |        | ██████ |        |
| PUFA               | Preformed FA | 0.4304      | 0.1531    | 0.6449    | 0.0035*     |        |        | ██████ |

| Variable         | by Variable  | Correlation | Lower 95% | Upper 95% | Signif Prob |  |
|------------------|--------------|-------------|-----------|-----------|-------------|--|
| PUFA             | Mixed FA     | -0.6267     | -0.7787   | -0.4053   | <.0001*     |  |
| PUFA             | OCFA         | -0.0698     | -0.3592   | 0.2319    | 0.6527      |  |
| PUFA             | BCFA         | 0.6970      | 0.5045    | 0.8235    | <.0001*     |  |
| PUFA             | OBCFA        | 0.4715      | 0.2031    | 0.6740    | 0.0012*     |  |
| PUFA             | SFA          | -0.5223     | -0.7092   | -0.2668   | 0.0003*     |  |
| PUFA             | MUFA         | 0.1772      | -0.1263   | 0.4504    | 0.2498      |  |
| UFA <sup>8</sup> | C12:0        | -0.6154     | -0.7714   | -0.3897   | <.0001*     |  |
| UFA              | C14:0        | -0.7387     | -0.8493   | -0.5660   | <.0001*     |  |
| UFA              | C16:0        | -0.8375     | -0.9085   | -0.7195   | <.0001*     |  |
| UFA              | C18:0        | 0.7924      | 0.6479    | 0.8818    | <.0001*     |  |
| UFA              | C20:5        | 0.3817      | 0.0956    | 0.6095    | 0.0106*     |  |
| UFA              | C22:6        | 0.3876      | 0.1026    | 0.6139    | 0.0093*     |  |
| UFA              | Denovo FA    | -0.7367     | -0.8481   | -0.5629   | <.0001*     |  |
| UFA              | Preformed FA | 0.9377      | 0.8880    | 0.9657    | <.0001*     |  |
| UFA              | Mixed FA     | -0.8242     | -0.9007   | -0.6981   | <.0001*     |  |
| UFA              | OCFA         | -0.4802     | -0.6801   | -0.2137   | 0.0010*     |  |
| UFA              | BCFA         | 0.2585      | -0.0416   | 0.5158    | 0.0902      |  |
| UFA              | OBCFA        | -0.1138     | -0.3973   | 0.1894    | 0.4619      |  |
| UFA              | SFA          | -0.8587     | -0.9208   | -0.7541   | <.0001*     |  |
| UFA              | MUFA         | 0.9702      | 0.9457    | 0.9837    | <.0001*     |  |
| UFA              | PUFA         | 0.4105      | 0.1294    | 0.6305    | 0.0056*     |  |
| AI <sup>9</sup>  | C12:0        | 0.7085      | 0.5212    | 0.8306    | <.0001*     |  |
| AI               | C14:0        | 0.8566      | 0.7507    | 0.9196    | <.0001*     |  |
| AI               | C16:0        | 0.9053      | 0.8320    | 0.9475    | <.0001*     |  |
| AI               | C18:0        | -0.7741     | -0.8708   | -0.6196   | <.0001*     |  |
| AI               | C20:5        | -0.4611     | -0.6667   | -0.1903   | 0.0016*     |  |
| AI               | C22:6        | -0.5364     | -0.7188   | -0.2849   | 0.0002*     |  |
| AI               | Denovo FA    | 0.8313      | 0.7095    | 0.9049    | <.0001*     |  |
| AI               | Preformed FA | -0.9448     | -0.9697   | -0.9005   | <.0001*     |  |
| AI               | Mixed FA     | 0.8903      | 0.8066    | 0.9390    | <.0001*     |  |
| AI               | OCFA         | 0.5837      | 0.3469    | 0.7505    | <.0001*     |  |
| AI               | BCFA         | -0.3587     | -0.5925   | -0.0692   | 0.0168*     |  |
| AI               | OBCFA        | 0.1055      | -0.1976   | 0.3901    | 0.4956      |  |
| AI               | SFA          | 0.9156      | 0.8498    | 0.9534    | <.0001*     |  |
| AI               | MUFA         | -0.8821     | -0.9343   | -0.7929   | <.0001*     |  |
| AI               | PUFA         | -0.4635     | -0.6684   | -0.1932   | 0.0015*     |  |
| AI               | UFA          | -0.9315     | -0.9623   | -0.8772   | <.0001*     |  |
| Hh <sup>10</sup> | C12:0        | -0.6541     | -0.7963   | -0.4433   | <.0001*     |  |
| Hh               | C14:0        | -0.8010     | -0.8870   | -0.6614   | <.0001*     |  |
| Hh               | C16:0        | -0.8490     | -0.9152   | -0.7382   | <.0001*     |  |
| Hh               | C18:0        | 0.7935      | 0.6497    | 0.8825    | <.0001*     |  |
| Hh               | C20:5        | 0.3967      | 0.1131    | 0.6205    | 0.0077*     |  |
| Hh               | C22:6        | 0.3999      | 0.1169    | 0.6229    | 0.0072*     |  |
| Hh               | Denovo FA    | -0.7936     | -0.8825   | -0.6497   | <.0001*     |  |
| Hh               | Preformed FA | 0.9438      | 0.8987    | 0.9691    | <.0001*     |  |
| Hh               | Mixed FA     | -0.8435     | -0.9120   | -0.7292   | <.0001*     |  |
| Hh               | OCFA         | -0.4875     | -0.6852   | -0.2228   | 0.0008*     |  |
| Hh               | BCFA         | 0.2385      | -0.0629   | 0.5000    | 0.1190      |  |
| Hh               | OBCFA        | -0.1333     | -0.4138   | 0.1703    | 0.3884      |  |
| Hh               | SFA          | -0.8729     | -0.9290   | -0.7775   | <.0001*     |  |

| Variable         | by Variable  | Correlation | Lower 95% | Upper 95% | Signif Prob |  |
|------------------|--------------|-------------|-----------|-----------|-------------|--|
| Hh               | MUFA         | 0.9369      | 0.8866    | 0.9653    | <.0001*     |  |
| Hh               | PUFA         | 0.4172      | 0.1374    | 0.6354    | 0.0048*     |  |
| Hh               | UFA          | 0.9708      | 0.9468    | 0.9841    | <.0001*     |  |
| Hh               | AI           | -0.9173     | -0.9543   | -0.8527   | <.0001*     |  |
| SI <sup>11</sup> | C12:0        | 0.4746      | 0.2069    | 0.6762    | 0.0011*     |  |
| SI               | C14:0        | 0.6041      | 0.3743    | 0.7640    | <.0001*     |  |
| SI               | C16:0        | 0.8867      | 0.8006    | 0.9370    | <.0001*     |  |
| SI               | C18:0        | -0.8344     | -0.9067   | -0.7145   | <.0001*     |  |
| SI               | C20:5        | -0.2960     | -0.5450   | 0.0010    | 0.0511      |  |
| SI               | C22:6        | -0.3243     | -0.5666   | -0.0303   | 0.0317*     |  |
| SI               | Denovo FA    | 0.6000      | 0.3688    | 0.7613    | <.0001*     |  |
| SI               | Preformed FA | -0.9165     | -0.9539   | -0.8513   | <.0001*     |  |
| SI               | Mixed FA     | 0.8782      | 0.7864    | 0.9321    | <.0001*     |  |
| SI               | OCFA         | 0.5453      | 0.2965    | 0.7249    | 0.0001*     |  |
| SI               | BCFA         | -0.2058     | -0.4737   | 0.0970    | 0.1801      |  |
| SI               | OBCFA        | 0.1943      | -0.1089   | 0.4644    | 0.2064      |  |
| SI               | SFA          | 0.7807      | 0.6297    | 0.8748    | <.0001*     |  |
| SI               | MUFA         | -0.8887     | -0.9381   | -0.8040   | <.0001*     |  |
| SI               | PUFA         | -0.3149     | -0.5595   | -0.0199   | 0.0373*     |  |
| SI               | UFA          | -0.9010     | -0.9451   | -0.8247   | <.0001*     |  |
| SI               | AI           | 0.9035      | 0.8291    | 0.9465    | <.0001*     |  |
| SI               | Hh           | -0.8557     | -0.9191   | -0.7491   | <.0001*     |  |

<sup>1</sup> \* FAs= fatty acids; <sup>2</sup> OCFA= odd chain FA; <sup>3</sup> BCFA= Branched chain FA; <sup>4</sup> OBCFA= Sum of the odd- and branched-chain fatty acids; <sup>5</sup> SFA= total sum of saturated FA; <sup>6</sup> MUFA =total sum of Mono unsaturated FA; <sup>7</sup> PUFA = total sum of Poly unsaturated FA; <sup>8</sup> UFA = total sum of unsaturated FA; <sup>9</sup> AI= the atherogenicity index; <sup>10</sup> h/H= The hypocholesterolemic and hypercholesterolemic fatty acids ratio (h:H); <sup>11</sup> SI=spreadability index calculated as 16:0/18:1 cis-9 Drackley *et al.* [1]

1. Drackley, J.K.; Overton, T.R.; Ortiz-Gonzalez, G.; Beaulieu, A.D.; Barbano, D.M.; Lynch, J.M.; Perkins, E.G. Responses to increasing amounts of high-oleic sunflower fatty acids infused into the abomasum of lactating dairy cows. *J. Dairy Sci.* **2007**, *90*, 5165-5175, doi:10.3168/jds.2007-0122.
